# Supplementary material for: Biological variation of serum Golgi protein 73 concentrations
Source: publisher site journal article supplement (doi:10.1515/cclm-2025-1029), 2025-08-25
Supplement: Supplementary file 1 [file j_cclm-2025-1029_suppl_001.docx]

**Biological variation of serum Golgi Protein 73 concentrations**

**Supplemental file**

**Biological variation of serum Golgi Protein 73 concentrations – Exclusion criteria**

Study group selection was based on data from the medical interview (questionnaire) and on laboratory test results obtained on the first day of blood collection (qualification tests verifying health status).

**Subjects were selected by applying the following exclusion criteria:**

1. Age lower than 18 years;
2. Pregnancy or breast-feeding;
3. Overt or subclinical thyroid disease and/or TSH results below 0.41 IU/L or above 4.00 IU/L (Abbott Alinity i measuring system) [1]. If TSH was in the range of 2.46–4.00 IU/L, a measurement of free T4 was performed and volunteers excluded if free T4 values were outside the physiological range;
4. History of liver and/or bile duct diseases, or Fibrosis-4 index ≥1.3 (for individuals <65 years old) or ≥2.0 (for in individuals ≥65 years old) [2], or serum albumin concentrations outside the 35-50 g/L reference interval;
5. Estimated glomerular filtration rate (eGFR) by CKD-EPI 2021 equation <60 mL/min/1.73 m2 [3];
6. History of cardiovascular disease, heart failure, thromboembolic disease, venous thrombosis, or stroke;
7. Systolic blood pressure ≥140 mmHg and/or diastolic blood pressure ≥90 mmHg [4];
8. History of mental illness;
9. Diabetes mellitus and/or prediabetic status, as defined by glycated hemoglobin (HbA1c) >42 mmol/mol [5];
10. History of cancer;
11. Obesity (body mass index ≥30 kg/m2) [6];
12. Upper and lower respiratory tract diseases,
13. Acute or chronic inflammatory status and/or C-reactive protein >10 mg/L [7];
14. Transferrin saturation ≥45% for women, ≥50% for men [8];
15. Hyperlipidemia, defined as serum LDL-cholesterol >190 mg/dL and/or serum triglycerides >200 mg/dL [9];
16. Complete blood count with significant abnormalities;
17. Current cigarette smoking;
18. Alcohol intake ≥10 g of ethanol/day in females and ≥20 g in males [10];
19. Medication and/or dietary supplements intake;
20. Work at any harmful conditions.

**References**

1. Stefanska A, Krintus M, Siodmiak J, Wolska A, Szternel L, Gackowska L, et al. Adult reference intervals for serum thyroid-stimulating hormone using Abbott Alinity i measuring system. Clin Chem Lab Med 2025;63:e104-7.
2. Stefanska A, Bergmann K, Suwała S, Mankowska-Cyl A, Kozinski M, Junik R, et al. Performance evaluation of a novel non-invasive test for the detection of advanced liver fibrosis in metabolic dysfunction-associated fatty liver disease. Metabolites 2024;14:52.
3. Delgado C, Baweja M, Crews DC, Eneanya ND, Gadegbeku CA, Inker LA, et al. A unifying approach for GFR estimation: Recommendations of the NKF-ASN Task Force on reassessing the inclusion of race in diagnosing kidney disease. J Am Soc Nephrol 2021;32:2994–3015.
4. Kreutz R, Brunström M, Burnier M, Grassi G, Januszewicz A, Muiesan ML, et al. 2024 European Society of Hypertension clinical practice guidelines for the management of arterial hypertension. Eur J Intern Med 2024:S0953-6205(24)00238-3.
5. Punthakee Z, Goldenberg R, Katz P. Diabetes Canada 2018 clinical practice guidelines in Canada: definition, classification and diagnosis of diabetes, prediabetes and metabolic syndrome. Can J Diabetes 2018;42(Suppl 1):S10-5.
6. Website: World Health Organization. Obesity and overweight. http://www.who.int/mediacentre/factsheets/fs311/en/ [Accessed July 2025].
7. Panteghini M. Developments in reference measurement systems for C-reactive protein and the importance of maintaining currently used clinical decision-making criteria. Clin Chem Lab Med 2023;61:1537-9.
8. European Association for the Study of the Liver. EASL Clinical Practice Guidelines on haemochromatosis. J Hepatol 2022;77:479–502.
9. Grundy SM, Stone NJ, Bailey AL, Beam C, Birtcher KK, Blumenthal RS, et al. AHA/ACC/AACVPR/AAPA/ABC/ACPM/ADA/AGS/APhA/ASPC/NLA/PCNA Guideline on the Management of Blood Cholesterol: A Report of the American College of Cardiology/American Heart Association Task Force on Clinical Practice Guidelines. Circulation 2019;139:e1082–143.
10. World Health Organization. Global Status Report on Alcohol and Health 2018. Geneva: WHO; 2018. <https://www.who.int/publications/i/item/9789241565639> [Accessed July 2025].
